# Supplementary material for: The Critical Issues for Patients and Caregivers in Neuro-Oncology During Covid-19 Pandemic: What We Have Learnt by an Observational Study.
Source: Preprints.org preprint supplement (doi:10.20944/preprints202404.0024.v1), 2024-04-01
Supplement: Supplementary file 1 [file supplementary]

| Title of the study  **Observational study on COVID pandemic effect in neuro-oncological patients and their caregivers** |
| --- |

**Study Code: Neo-CO**

vers 1.0, 04.05.2020

**COVID-19 (CORONAVIRUS SARS-CoV-2) PANDEMIC ERA:** THE EXPERIENCE OF NEURO-ONCOLOGICAL PATIENT AND HIS CAREGIVER

**PATIENT INTERVIEW (schedula A) CODE______________**

**DEMOGRAPHIC DATA:**

1. **AGE**

- 18 - 25
- 25 – 40
- 40 – 55
- 55 – 70
- Over

1. **SEX**

- Male
- Female

1. **NAZIONALITY**

- Italian (if yes, specify the region) ______________________________
- foreign (if yes, specificy) _____________________________________

**CLINICAL DATA:**

1. **DISEASE DIAGNOSIS**

- glioma (including GBM)
- meningioma
- ependimoma
- medulloblastoma
- PCNSL
- neurinoma
- other (specificy)____________________________________________________________

1. **SINCE THE DISEASE WAS DIAGNOSED?**

- Less than 3 months
- 3-6 months
- 6-12 months
- More than 1 year
- More than 5 year

1. **TRATTAMENTS ALREADY DONE:**

- cerebral biopsy
- neurosurgery
- Radiotherapy
- Chemotherapy
- Immunotherapy
- rehabilitation/speech therapy
- therapy (specify) ___________________________________________________________

1. **ONGOING TREATMENTS:**

- Radiotherapy
- Chemotherapy
- Immunotherapy
- rehabilitation/speech therapy
- therapy (specify) ___________________________________________________________

1. **ARE YOU ENROLLED IN A CLINICAL TRIAL?**

- Yes (specify) ______________________________________________________________
- No

1. **ANY SIGNS OF THE DISEASE:**

- Speech/comprehension impairment (e.s: aphasia)
- Sensitive abnormalities
- Cognitive (memory, attention, spatial- temporal orientation, etc.) deficit
- Motor Deficit
- seizures
- headache
- other (specify) ___________________________________________________________
- No

**COVID 19 RELATED DATA:**

1. **HOW IS YOUR PERCEPTION OF THE RISK OF CONTRACTING THE VIRUS Coronavirus SARS CoV-2?**

- same risk of general population
- higher risk of general population
- lower risk than general population

1. **HAVE YOU BEEN TESTED FOR Coronavirus SARS-CoV-2?**

- yes
- No

1. **HAVE YOU COMPLAINED ANY SYMPTOMS RELATED TO COVID-19?**

- yes (specify) ________________________________________________________________
- No

1. **HAVE YOU GOT Coronavirus SARS-CoV-2 INFECTION?**

- yes
- No

1. **DO YOU KNOW PEOPLE WHO GOT Coronavirus SARS-CoV-2 INFECTION?**

- yes (specify) __________________________
- No

**DATA RELATED TO DISCOMFORT LINKED TO THE PRESENT LIFESTYLE OR WAY /CONDITION OF LIFE?:**

1. **HOW DO YOU FEEL IN THIS PERIOD?**

- I feel I have sufficient resources to deal with the situation
- I’m worried
- I feel I’ve exhausted my resources
- Other (specify)__________________________________________

1. **HOW IT WOULD ASSESS ITS ANXIOUS STATE RELATED TO THE DIAGNOSIS OF BRAIN CANCER? ON A SCALE OF 1 TO 10 (where 1 indicates total absence and 10 the highest level of anxiety)**

1 2 3 4 5 6 7 8 9 10

1. **HAVE YOU ADOPTED ANY STRATEGIES TO COMBAT ANXIETY? IF YES, WHICH ONES?**

_____________________________________________________________________________________________________________________________________________________________________

1. **HOW WOULD YOU ASSESS YOUR ANXIETY ABOUT THE PERCEIVED RISK OF CONTRACTING COVID-19? ON A SCALE OF 1 TO 10 (where 1 indicates total absence and 10 the highest level of anxiety)**

1 2 3 4 5 6 7 8 9 10

1. **HAVE YOU ADOPTED ANY STRATEGIES TO COMBAT SUCH ANXIETY (RELATED TO COVID)? IF YES, WHICH ONES?**

_____________________________________________________________________________________________________________________________________________________________________

1. **ARE YOU AFRAID OF THE CURRENT HEALTH STATUS RELATED TO COVID-19 (Coronavirus)?**

- yes
- No

**DATA RELATIVE TO OVERALL CARE/SUPPORT:**

1. **HAVE YOU EVER PLANNED (OR SOMEONE PROPOSED TO YOU) ANY TYPE OF PSYCOLOGICAL SUPPORT?**

- Yes, I’m following a psychological therapy
- No

1. **WHAT DO YOU THINK COULD HAVE HELPED YOU IN THIS PERIOD OF LIFE?**

- support groups -si chiamano così?
- Support material
- social relationship
- Interaction with other professionists to get more information
- other (specify) ___________________________________________________________

1. **In this period of limitation of movement and social contacts, technology can play an important role in reducing the isolation? Which tool you use?**

- Smartphone for voice call
- Smartphone for videocall
- Computer for hobbies
- Computer for information and education
- other (specify)____________________________________________________________

**DATA RELATED TO QUALITY INFORMATION OBTAINED ON COVID-19 (Coronavirus):**

1. **WHAT SOURCES OF INFORMATION DO YOU CONSULT OR CONSULT?**

- General doctor
- specialist
- Tv and newspaper
- Internet
- Relatives/friends
- other (specify)____________________________________________________________

1. **ARE YOU SATISFY OF THE INFORMATION QUALITY?**

- yes, because____________________________________________
- No, because____________________________________________

1. **IF YOU REPLIED “NO” AT QUESTION 25, PLEASE SPECIFY WHICH INFORMATION YOU WILLING TO HAVE?**

**___________________________________________________________________________________________________________________________________________________________________________________________________________________________________________________**

**DATA RELATIVE TO TUMOR MANAGEMENT:**

1. **HAVE YOU POSTPONED ANY NEURO-ONCOLOGICAL THERAPY OPTION DUE TO COVID-19 PANDEMIC?**

- Yes (specify)________________________________________________________________
- No

1. **HAVE YOU OPTED TO MODIFY NEURO-ONCOLOGICAL THERAPY DUE TO COVID-19 EPIDEMIC?**

- Yes (specify)________________________________________________________________
- No

1. **ARE YOU WORRIED ABOUT COVID-19 ANY TIME YOU ACCESS TO THE HOSPITAL FOR NEURO-ONCOLOGICAL DISEASE EVALUATION/THERAPY?**

- yes
- No

1. **IF YOU REPLIED “YES” TO THE QUESTION 29: ARE THERE ANY STRATEGIES THAT THE HEALTH PERSONNEL COULD BE ADOPT TO DICREASE YOUR DISCOMFORT?**

**__________________________________________________________________________________________________________________________________________________________________**

1. **DO YOU FEEL ANY CHANGE WITH YOUR HEALTH PERSONNAL DURING COVID-19 ERA?**

- YES, with any health professionist
- Only with some
- No

1. **ARE YOU SATISFIED ABOUT THENEURO-ONCOLOGICAL TREATMENT MANAGEMENT?**

- yes (specify)____________________________________________________________
- No (specify) ____________________________________________________________

1. **DO YOU HAVE ANY SUGGESTIONS TO IMPROVE THE QUALITY OF INTERACTION BETWEEN YOU AND THE HEALTH PROFESSIONIST STAFF?**

**__________________________________________________________________________________________________________________________________________________________________**

**EVERYDAY LIFE:**

1. **WITH WHOM DO YOU LIVE?**

- alone
- with relatives
- other____________________________

1. **ARE YOU PRESENTLY ISOLATED DUE TO COVID-19 (Coronavirus)?**

- Yes
- No

1. **IF YOU ARE A WORKER: DO YOU THINK THAT YOUR WORK WILL BE AT RISK BECAUSE OF COVID-19?**

- Yes
- No

1. **WHICH ARE THE ASPECTS OF YOUR LIFE THAT HAVE BEEN MORE INFLUENCED BY COVID-19 PANDEMIC?**

- health
- work
- Social
- Economic
- Psyhcological
- Other

1. **HOW IS YOUR QUALITY OF LIFE NOWDAYS?**

- Optimal
- Very good
- good
- unsatisfactory
- not at all satisfactory

**THE FUTURE:**

1. **SINCE COVID-19 PANDEMIC, DO YOU CHANGE YOUR PERCEPTION ABOUT THE FUTURE?**

- yes
- No

1. **IF YOU REPLIED “YES” TO QUESTION 39, HOW DO YOU PERCEIVE YOUR FUTURE:**

- More uncertain
- modified, including also postiive aspects
- “Suspended”
- Full of fair
- Other (specify)____________________________________________________________ __________________________________________________________________________

1. **ARE THERE ANYTHING IN THE PRESENT DAYLIFE (MODIFIED DUE TO COVID-19), THAT COULD BE USEFUL FOR THE FUTURE ALSO?**

- Capacity to mamange any emergency
- Higher sense of responsabiltiy
- Better use of techonologies
- Attention to social dimension
- to take care of myself
- other (specify) ______________________________________________________________

Would you like to add other suggestions/comments?

**_______________________________________________________________________________________**

**_______________________________________________________________________________________**

**_______________________________________________________________________________________**

| Title of the study  **Observational study on COVID pandemic effect in neuro-oncological patients and their caregivers** |
| --- |

**Study Code: Neo-CO**

vers 1.0, 04.05.2020

**COVID-19 (CORONAVIRUS SARS-CoV-2) PANDEMIC ERA:** THE EXPERIENCE OF NEURO-ONCOLOGICAL PATIENT AND HIS CAREGIVER

**CAREGIVER INTERVIEW (schedula B) CODE______________**

**DEMOGRAPHIC DATA:**

1. **AGE**

- 18 - 25
- 25 – 40
- 40 – 55
- 55 – 70
- OVER

1. **SEX**

- Male
- Female

1. **NAZIONALITY**

- Italian (if yes, specify the region) _______________________________
- foreign (if yes, specificy) _______________________________________________

1. **WHICH RELATIONSHIP TO YOU HAVE WITH THE PATIEN?**

- Patient’s parent
- Patient’s wife/husband
- Patient’s partner
- Patient’s siblin
- Other patient’s relative
- Patient’s friend
- other (specificy)____________________________________________________________

**COVID-19 RELATED DATA:**

1. **ARE YOU WORRIED TO CONTRACT THE VIRUS Coronavirus SARS CoV-2?**

- I’m very worried
- I’m quite worried
- L’m not worried
- I already got it

1. **WHAT CONCERNS SHOULD YOU ADDRESS AS A CAREGIVER OF A PATIENT DIAGNOSED WITH BRAIN CANCER AT A TIME WHEN Coronavirus SARS-CoV-2 INFECTION HAS SPREAD?**

- I’m worried that the patient could not access to the treatment/follow-up
- I’m worried that the patient could get Coronavirus infection
- I’m worried to access to the hospital
- I am concerned about the burdens of the practical management of cancer disease in a difficult context such as that caused by COVID-19 (booking visits, travel, appointments, administration of therapies with attention to distance, masks, caution and attention)
- I’m worried about my work/economic situation
- I have no particular worries about covid-19 pandemic

1. **As a result of the spread of Covid-19 (Coronavirus), has the perceived burden of the assistance you provide to the person you are dealing with increased?**

- No, nothing changed
- Yes (please, add a description)_________________________________________________

**DATA RELATED TO DISCOMFORT LINKED TO THE PRESENT LIFESTYLE OR WAY /CONDITION OF LIFE?:**

1. **HOW IT WOULD ASSESS ITS ANXIOUS STATE RELATED TO THE DIAGNOSIS OF BRAIN CANCER OF YOUR DEAR? ON A SCALE OF 1 TO 10 (where 1 indicates total absence and 10 the highest level of anxiety)**

1 2 3 4 5 6 7 8 9 10

1. **HAVE YOU ADOPTED ANY STRATEGIES TO COMBAT ANXIETY? IF YES, WHICH ONES?**

_____________________________________________________________________________________________________________________________________________________________________

1. **HOW WOULD YOU ASSESS YOUR ANXIETY ABOUT THE PERCEIVED RISK OF CONTRACTING COVID-19? ON A SCALE OF 1 TO 10 (where 1 indicates total absence and 10 the highest level of anxiety)**

1 2 3 4 5 6 7 8 9 10

1. **HAVE YOU ADOPTED ANY STRATEGIES TO COMBAT SUCH ANXIETY (RELATED TO COVID)? IF YES, WHICH ONES?**

_____________________________________________________________________________________________________________________________________________________________________

1. **WHICH AREAS HAVE BEEN MORE AFFECTED BY COVID-19 PANDEMIC?**

- health
- work
- social
- economic
- psycological
- other___________________

**DATA RELATIVE TO OVERALL CARE/SUPPORT:**

1. **HAVE YOU EVER PLANNED (OR SOMEONE PROPOSED TO YOU) ANY TYPE OF PSYCOLOGICAL SUPPORT?**

- Yes, I’m following a psychological therapy
- No

1. **WHAT DO YOU THINK COULD HAVE HELPED YOU IN THIS PERIOD OF LIFE?**

- support groups
- Support material
- social relationship
- Interaction with other professionists to get more information
- other (specify) ___________________________________________________________

1. **In this period of limitation of movement and social contacts, technology can play an important role in reducing the isolation? Which tool do you use?**

- Smartphone for voice call
- Smartphone for videocall
- Computer for hobbies
- Computer for information and education
- other (specify)____________________________________________________________

1. **HOW DO YOU EVALUATE YOUR QUALITY OF LIFE NOWDAYS?**

- optimal
- very good
- good
- unsatisfactory
- not at all satisfactory

**THE FUTURE:**

1. **SINCE COVID-19 PANDEMIC, DO YOU CHANGE YOUR PERCEPTION ABOUT THE FUTURE?**

- yes
- No

1. **IF YOU REPLIED “YES” TO QUESTION 17, HOW DO YOU PERCEIVE YOUR FUTURE:**

- More uncertain
- modified, including also postiive aspects
- “Suspended”
- Full of fair
- Other (specify)____________________________________________________________ ____________________________________________________________________________________________________________________________________________________

1. **ARE THERE ANYTHING IN THE PRESENT DAYLIFE (MODIFIED DUE TO COVID-19), THAT COULD BE USEFUL FOR THE FUTURE ALSO?**

- Capacity to mamange any emergency
- Higher sense of responsabiltiy
- Better use of techonologies
- Attention to social dimension
- to take care of myself
- other (specify) _______________________________________________________

Would you like to add other suggestions/comments?

**_______________________________________________________________________________________**

**_______________________________________________________________________________________**

**_______________________________________________________________________________________**
